# Supplementary material
Source: PubMed Central journal article supplement (PMC6193817)
Supplement: NIHMS1503356-supplement-3.pdf [file NIHMS1503356-supplement-3.pdf]

# A

CAAATGCAAGACTGGTGTCTTTCAAGAAACCAAGGACTGTTGAAAGTAGC -1951  
-1950 AAGAGCTAGTTGTTTTAGGTCCATCATGTTTTATATTCACACTTTCATGTCTAGTGGAGCAAAGAAATGGAATACAATATAATAGAAATGGTAGAATCTTATTTTTAAAATCTGTGTTATTCTGATCTTAACTTACTTATATCTTTGATA -1801  
-1800 GAGATCTTTACCTGATGCTCAAGATTGTAGAAATAGTATAATCAACATAACAGTATAGCACTGTATTATATCTCTGCACCTGTTTAGGGAGGTTTAAAGCCATTCAAAGGATACATAAAAATACAACAAGATTACATAAATGAAAGGTGA -1651  
-1650 GATAAAGCAACAAGCAAAAACAAAAGTGAAGACAGAGATCATAGGCACAAAATAAGATTAAAAACGCATGTAATGAAGATGAAAGCTTTTACATTTACCCAGATGGACCACAGGGTGTGTGTTAAGCCTTTAAACAGTGAACAATGCTGT -1501  
-1500 ACACCTGCATATGCAATTAGAACATGTGAAAAAATAGTGGCCGTGTAGAACCTAATTAACAATTTGTGAAAAAAGAGGCGAGCTGTAGTCCAGCTACCTGGGAGGCTGAGGAGGAGAAATGTTGTGAACC -1351  
-1350 GCGGATCACGAGGTGAGGATCAAGACCATCTCGCTAACACAGTGAACCCAGTCTCTACGAAAAATACAAAAATAGCCGGGCTGGTGGCGGAGCCTGTAGTCCAGCTACCTGGGAGGCTGAGGAGGAGAAATGTTGTGAACC -1201  
-1200 CGGGAGGCGGAGCTTGCAGTGAAGCAGATCCTGCCACTGCACCTCCAGCTGGGCGACAAAGCAAGACTCCGTCTCAAAGAAAGAAAGAAAGAAACAAAGAAACTTCAATTGTATTGTAAGCCAAAGAAATATATCAAGAT -1051  
-1050 AAGGAAATTTGTAGTCAAGAAATAGAAAAAATATGGCTTTGAAGTATGAGTTATTTAAAGAAAGTGAACATCCTCAGACTATGCAGTAAAAACAAAGTGAATTTCTTCTTCAAACCTATGCAATAAACTGATAGGTAATATGTG -901  
-900 AAAGTCATAGAATGTAGACTAGAGGATACAACAAACCTATTTCCTCTATGTTTCATAAGAAGTAAAGAAAGCTCTGATGTGAGTTAGCATTGCTTTACAATTTTGAATTTGTGCAGATTGCACGTAATTTCTCAGTTTGAAGTAAATAGT -751  
-750 GGACAGAAAAAATATAAATGTTGGCAGTAAATATGGAAGGAAATTAACAATAATGTAATATGCTAAAAACATGCTATGTTTATTTTACTAATTTGAATTAATAAGAAATTAATAAGTCCCTGGAAAAACACGGGCATGATCTGCAC -601  
-600 GTCTGAAGTTTTAAAATATACACACTTTGAAATAGCATTGTACCTTGAATACCTGTCTCTATATATTTTTAAAACCTCTTTTCTTTTCACTCCATTTATCATCAATAAAGGATGAACAGATGTAACCTCAGAACTGTCAAGCAT -451  
-450 GCTGAAGAAAGACCATGCAGAAAAATTTCTCCTAGCCTTTTCAAAGGTGTAGGAAGCAGAAAGGTGATACAGAATGGAGAGGTCGGAGTTTTTGTATTAACGTGATTAATAAGCAGTCCCGAGAAAAATTTCCCTTAACTACGTCCTG -301  
-300 TAGTTATATGGATATGAAGACTTATGTGAAGCTTTGAAAGACGTGTCTACATAAGTTGAAATGTCCCAATGATTGAGTGTGCGGCTTTCTCTACTTGGCCTTTCTAGAGAGGTGCAACGGAAAGCCAGAACATTTCCCTCTGAAATTTCA -151  
-150 ACCGTTCGCGAGTTTCTCAGGAAATCAGCATTCAGTCAATCCGGGCGGGAGCAGTCACTGTGGTGGGCTGATTTGGCTGGGCGGAAACAGCCCGGGGCGTGGGCTGAGCACAGCCGCTTCGCTCTCTTTCCACAGGAAGCCTGAG -1

# B

CCATTGTGCCAGCCAGTGGGCACCTTCTTAACTCCTTGTAGCCTGGAA -1951  
-1950 CTCTGGGCTAAAGCCATCCTCCTGTCTCAGCCTCAGAGTGGGACTACAAGGATACGCCACACACCTGGGCTAAATTTTTAAAACCTTTGGTAGAGACAGAGCCTCACTATGTCTGGCTAGCCTGTGCTTGAATTTAAATATGTG -1801  
-1800 TTTGTGTAAGGCTTTCTTTAAAAGCTATTAACATACTATTTTAGCAAATATACATGGGAAATATCAAGGAACAATAAAATGATCTTGTCCCAAGCACCATGAACCTGGAGCCTTTCATTTTTTTTCACTCAGGGTGGATATGAAGAGC -1651  
-1650 AGCTGTGACCTTGTAAAGTAGCCACAGAAATGACTGAAGACTTAGAGGTGGGAGTACACAAGCTTGAACAAGATTTTGTTCATTCATTTCCACAGCCATTAACACAGCATAATTCGGGCACTTCTCATGCACACTGGCCATCCACCA -1501  
-1500 GGGAGACAGGCCATGCTTAGACATAGGCTTATGCAAAATCATGTTTTATCTTTCTTGGCTCTAAGACTGGACAAGTCTGCCTTTACAGCTTACCTTCCATCATATAAAGTAAGGATAACCTTGAATGGGCACTGATAGAATTAATA -1351  
-1350 GTGAGATAATTGGTCGGGCTGGTGGTACATGCTGTAATCCTAGCACTTTGGGAGGCCACGGTGGGAGGATCACTTGAGCCTAGGAGTTTGAGACCAGCCTGGGCAACAAGTGAAGAAATATCAAGGAACAATAAAATGATCTTATTA -1201  
-1200 CAAAGAAAACCAAAATTCACAAATGCAATGAAATATGAAGAAAATAAACCTCCATGACAATCATTGGCTTCAAAAATATCAGTATTTGAACTTGGAGCCTTTGATTTTGATTTTGCATCTACAAAAATTAACAAAATATGAGCCGG -1051  
-1050 GTGTGGTGGCGGCTGCCTGTAGTCTAGCTACTTAAACTGAGTTGGGAGGATTGCTTGAGCCCTGGGAGGTCGAGGTCGAATGAGCCATAATCGTGACACTGTGTGTGAGACTGCCACACACACACACACACACTAGTGAGGC -901  
-900 TACGCACTCAGAAATGCACATGAACATCACTGGTATTCTGGAACCCAGTGTGCTTTGCCACTGTTATCTGTTAGGCTTTAGGCTTGACGACAGAAATCATCAGGCACTCTCTTTCTCTTATATTTCTTTCCAACTCTAAGGGGGC -751  
-750 AGCAAAAAGCTCAGAGGTCCACCCTAGCATGCAACATGTGAGATGCTTAAAGCCGCCCCCATCGACGACAGCATTATCCATCTCCCGAATTCATCTGGGTACACTCTCGAGTTACCCGGCTTTCTTGGAGTCTTGCAGCTCTACAAG -601  
-600 GATAATCTGTGGCTAAACTTTGCTGTGCTCAAGGTCAAATGTTGGCTCACAGGTTGAAGAGCCTCCCATGGCACCCTGTTTGGTCTGAGAAGGAAAGGCGCCAGGGGGCGGGCTGTAGAGCAGGAGCAGCTGTCTCCAGTC -451  
-450 TTCCAAACCCGTAGCCGAGGGGGCTTTCTGCGGCGAGGGGGGGCACAGCCGACCTCCCTGCTCCACTTCTGTGTGGGCTTAGACTCGGATAGTGAATTTGGAAGTTTCACTCGGGTTCGTGCAGCTGGGCACTCCGGA -301  
-300 CCCGCTCTTGGCGGCGCTCTGCTACCTCTCCATCCAGCGGCGAGGGGGCTCGCTCACCCCTGGGCTAGCTTGGCTCCCTTTGGCGTGCAGCTTGCCTCTCCCGCGGCTCTCTCCCGCGGCTCACCCGTCGG -151  
-150 TCCCGCGGCTCGCACGGGTGCGCAGCTCCCGGGCTCCAGCGGCGGCGCTAGCGGGCGCCCGAGGCGGCGGGCTGAGAGGCGGGGAGGGGCGTGCCTCGCGGCGCCGGCTCCCGAAGCGGCTGCTTCAAGGCTCCAGCC -1
