# Supplementary material
Source: PubMed Central journal article supplement (PMC6193817)

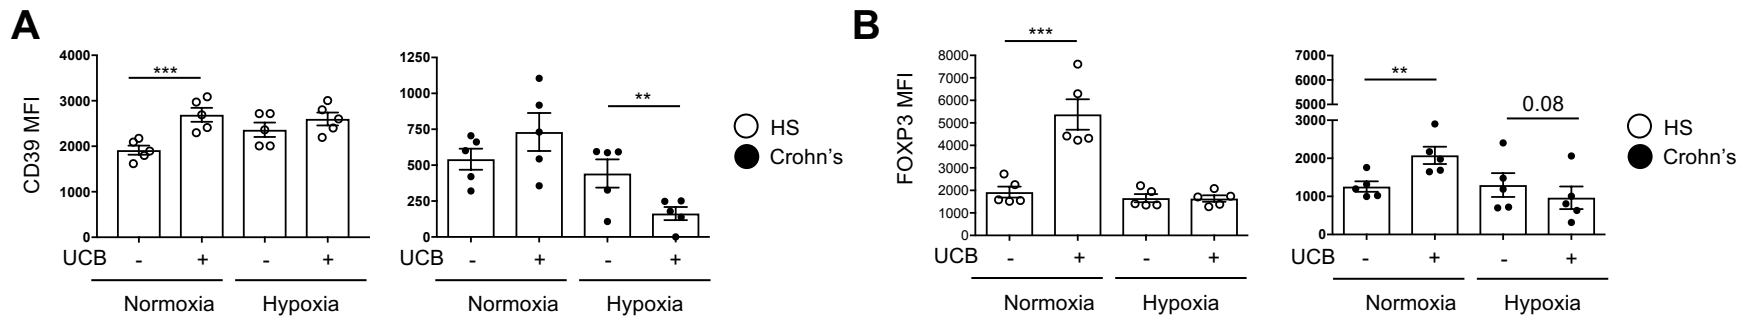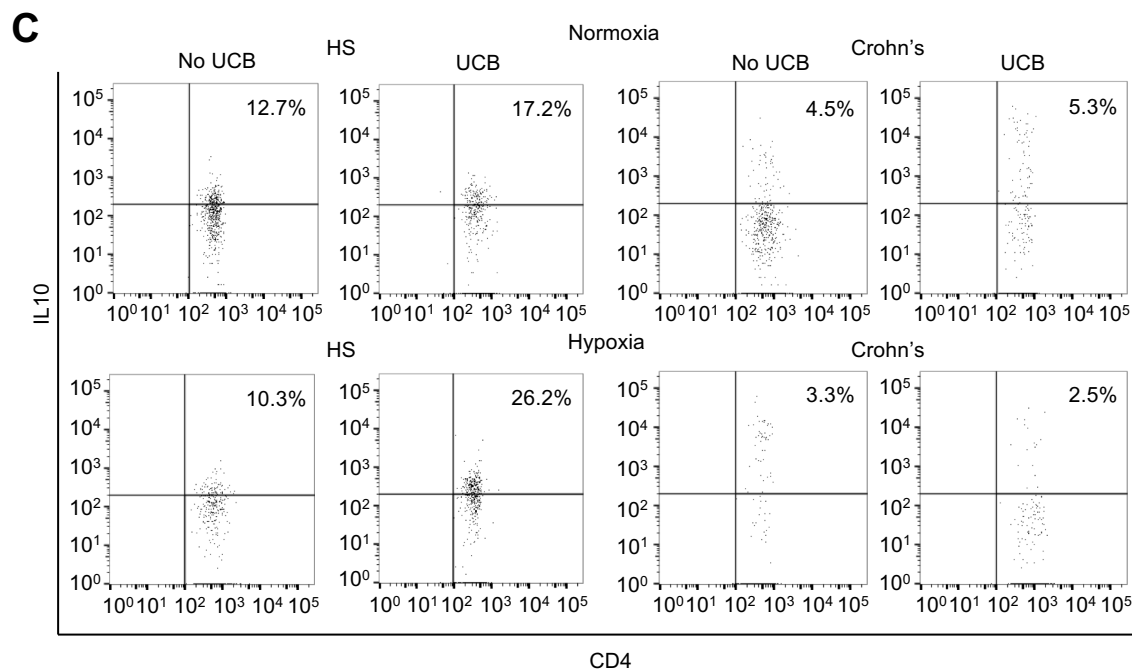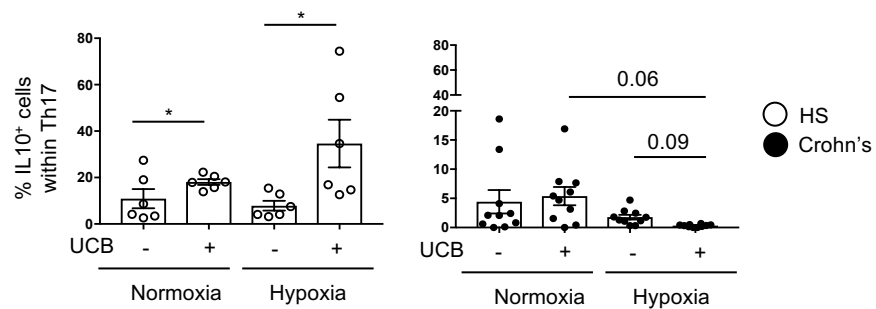

Supplement: NIHMS1503356-supplement-2.pdf [file NIHMS1503356-supplement-2.pdf]

**A**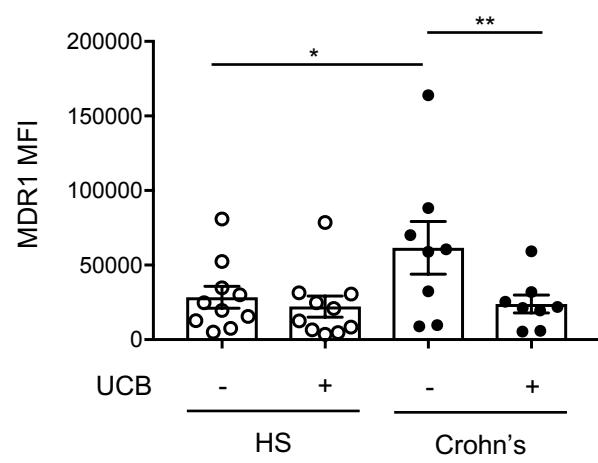**B**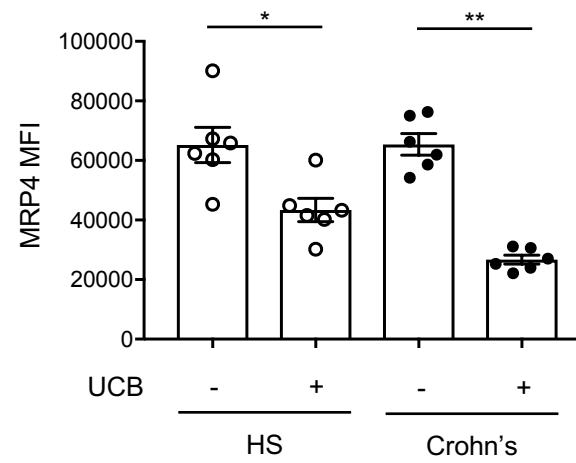

Supplement: NIHMS1503356-supplement-4.pdf [file NIHMS1503356-supplement-4.pdf]

**A**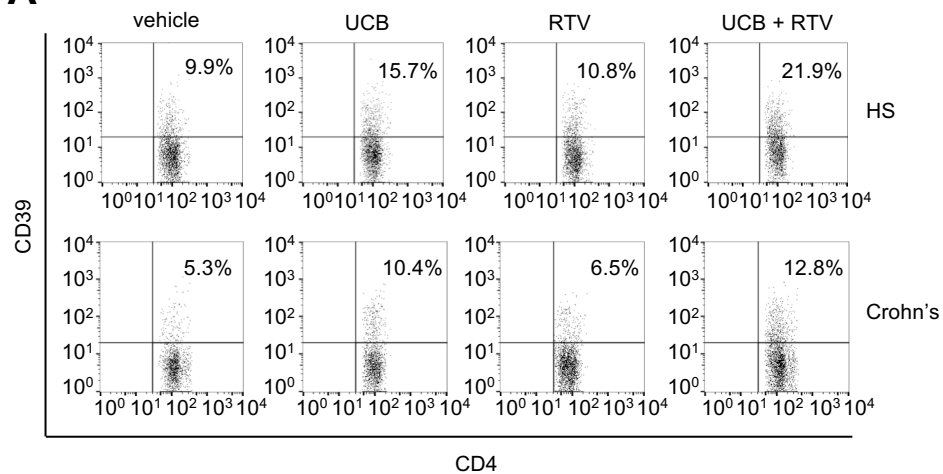**B**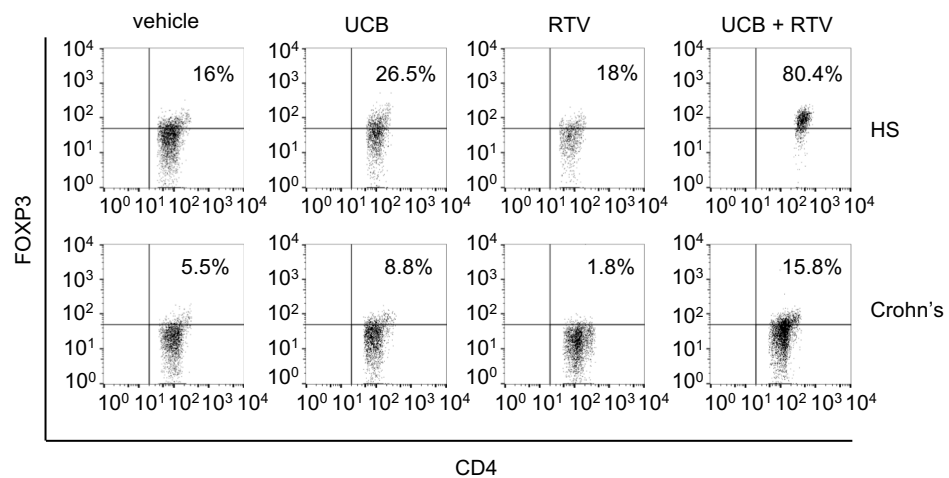

Supplement: NIHMS1503356-supplement-6.pdf [file NIHMS1503356-supplement-6.pdf]

**A**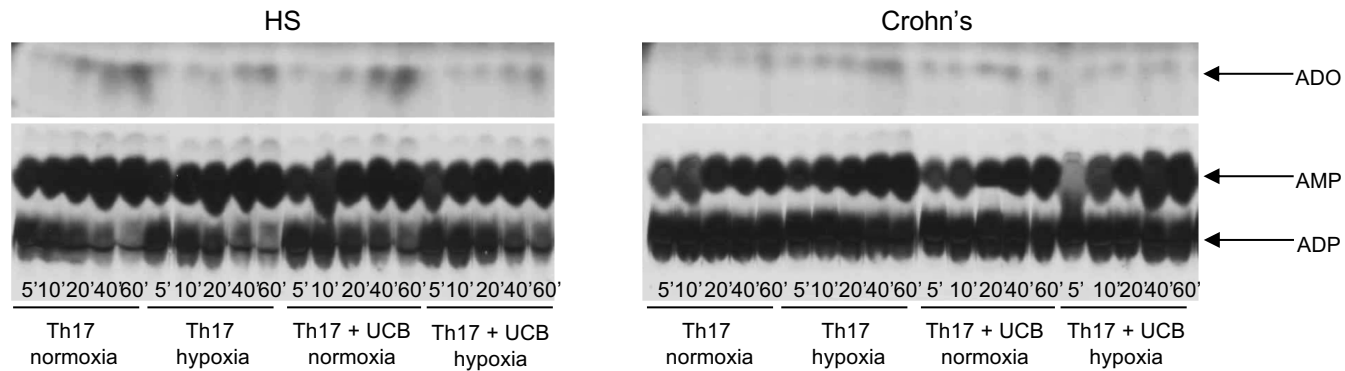**B**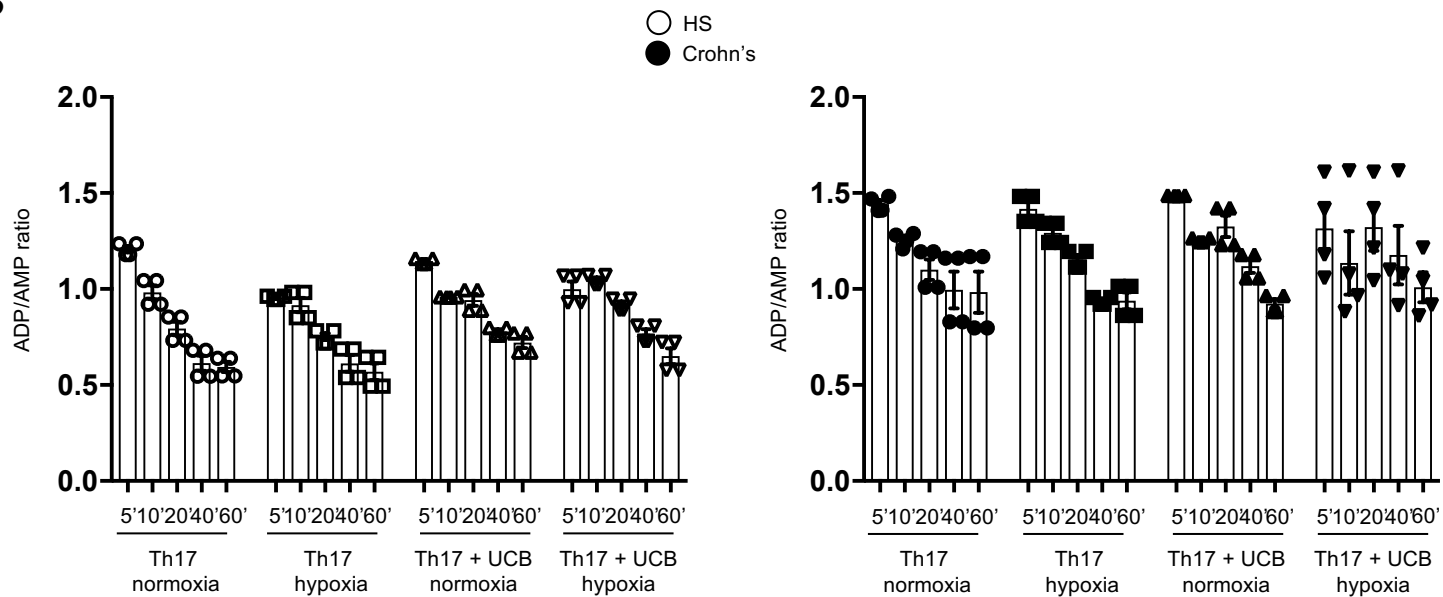

Supplement: NIHMS1503356-supplement-8.pdf [file NIHMS1503356-supplement-8.pdf]
